# Supplementary material
Source: publisher figshare collection journal article supplement (https://frontiersin.figshare.com/ndownloader/files/13059206)
Supplement: Supplementary file [file 13059206]

| Variable          |                | mean   | SD    | p     | 95% CI          |
|-------------------|----------------|--------|-------|-------|-----------------|
| <b>Log2(CNRQ)</b> |                |        |       |       |                 |
| <b>CCL2</b>       |                |        |       |       |                 |
| Ligand            |                |        |       |       |                 |
|                   | AIF            | 0.049  | 0.452 | 0.914 | -0.837 ; 0.934  |
|                   | curdlan        | 2.597  | 0.436 | 0.000 | 1.742 ; 3.452   |
|                   | chitin         | -0.175 | 0.436 | 0.688 | -1.031 ; 0.680  |
| Genotype          |                |        |       |       |                 |
|                   | FIBCD1         | 0.554  | 0.285 | 0.052 | -0.005 ; 1.113  |
| Interaction       |                |        |       |       |                 |
|                   | AIF#FIBCD1     | -2.910 | 0.403 | 0.000 | -3.700 ; -2.120 |
|                   | curdlan#FIBCD1 | 0.331  | 0.403 | 0.412 | -0.460 ; 1.121  |
|                   | chitin#FIBCD1  | -0.054 | 0.403 | 0.893 | -0.844 ; 0.736  |
| cons              |                | -0.003 | 0.319 | 0.992 | -0.629 ; 0.623  |
| <b>CCL5</b>       |                |        |       |       |                 |
| Ligand            |                |        |       |       |                 |
|                   | AIF            | -0.365 | 0.464 | 0.431 | -1.275 ; 0.544  |
|                   | curdlan        | 3.517  | 0.459 | 0.000 | 2.616 ; 4.417   |
|                   | chitin         | -1.089 | 0.459 | 0.018 | -1.989 ; -0.188 |
| Genotype          |                |        |       |       |                 |
|                   | FIBCD1         | -0.130 | 0.382 | 0.735 | -0.879 ; 0.619  |
| Interaction       |                |        |       |       |                 |
|                   | AIF#FIBCD1     | -0.401 | 0.540 | 0.458 | -1.460 ; 0.658  |
|                   | curdlan#FIBCD1 | -0.609 | 0.540 | 0.260 | -1.668 ; 0.450  |
|                   | chitin#FIBCD1  | 0.073  | 0.540 | 0.892 | -0.986 ; 1.132  |
| cons              |                | -0.140 | 0.328 | 0.671 | -0.783 ; 0.503  |
| <b>CCL20</b>      |                |        |       |       |                 |
| Ligand            |                |        |       |       |                 |
|                   | AIF            | 0.843  | 0.485 | 0.082 | -0.108 ; 1.794  |
|                   | curdlan        | 3.314  | 0.485 | 0.000 | 2.363 ; 4.264   |
|                   | chitin         | 0.025  | 0.485 | 0.959 | -0.926 ; 0.976  |
| Genotype          |                |        |       |       |                 |
|                   | FIBCD1         | -4.583 | 0.469 | 0.000 | -5.501 ; -3.665 |
| Interaction       |                |        |       |       |                 |
|                   | AIF#FIBCD1     | -0.858 | 0.663 | 0.196 | -2.156 ; 0.441  |
|                   | curdlan#FIBCD1 | 2.329  | 0.663 | 0.000 | 1.030 ; 3.628   |
|                   | chitin#FIBCD1  | 1.656  | 0.663 | 0.012 | 0.357 ; 2.954   |
| cons              |                | -0.161 | 0.343 | 0.640 | -0.833 ; 0.512  |
| <b>CSF2RA</b>     |                |        |       |       |                 |
| Ligand            |                |        |       |       |                 |
|                   | AIF            | -0.952 | 0.352 | 0.007 | -1.643 ; -0.262 |
|                   | curdlan        | 0.103  | 0.328 | 0.753 | -0.539 ; 0.746  |
|                   | chitin         | 0.153  | 0.328 | 0.641 | -0.490 ; 0.796  |
| Genotype          |                |        |       |       |                 |

|             |                |        |       |       |                 |
|-------------|----------------|--------|-------|-------|-----------------|
| Interaction | FIBCD1         | -1.574 | 0.143 | 0.000 | -1.853 ; -1.294 |
|             | AIF#FIBCD1     | -1.486 | 0.202 | 0.000 | -1.882 ; -1.091 |
|             | curdlan#FIBCD1 | 0.428  | 0.202 | 0.034 | 0.033 ; 0.823   |
|             | chitin#FIBCD1  | 0.159  | 0.202 | 0.430 | -0.236 ; 0.554  |
| cons        |                | -0.023 | 0.249 | 0.928 | -0.511 ; 0.466  |

## TNF

|             |                |        |       |       |                 |
|-------------|----------------|--------|-------|-------|-----------------|
| Ligand      | AIF            | -0.057 | 0.686 | 0.934 | -1.401 ; 1.288  |
|             | curdlan        | 3.950  | 0.643 | 0.000 | 2.689 ; 5.212   |
|             | chitin         | 0.011  | 0.643 | 0.986 | -1.250 ; 1.272  |
| Genotype    | FIBCD1         | -1.053 | 0.310 | 0.001 | -1.661 ; -0.445 |
| Interaction | AIF#FIBCD1     | 0.082  | 0.439 | 0.852 | -0.778 ; 0.941  |
|             | curdlan#FIBCD1 | 0.051  | 0.439 | 0.908 | -0.809 ; 0.910  |
|             | chitin#FIBCD1  | 0.225  | 0.439 | 0.609 | -0.635 ; 1.084  |
|             | cons           | -0.010 | 0.485 | 0.984 | -0.960 ; 0.941  |

## TSLP

|             |                |        |       |       |                 |
|-------------|----------------|--------|-------|-------|-----------------|
| Ligand      | AIF            | 0.341  | 0.279 | 0.221 | -0.205 ; 0.888  |
|             | curdlan        | -0.114 | 0.276 | 0.679 | -0.655 ; 0.427  |
|             | chitin         | -0.244 | 0.276 | 0.378 | -0.784 ; 0.297  |
| Genotype    | FIBCD1         | -0.974 | 0.227 | 0.000 | -1.420 ; -0.528 |
| Interaction | AIF#FIBCD1     | -0.707 | 0.322 | 0.028 | -1.734 ; -0.076 |
|             | curdlan#FIBCD1 | -0.046 | 0.322 | 0.885 | -0.677 ; 0.584  |
|             | chitin#FIBCD1  | -0.208 | 0.322 | 0.517 | -0.839 ; 0.422  |
|             | cons           | -0.013 | 0.197 | 0.947 | -0.400 ; 0.374  |

## IL1B

|             |                |        |       |       |                 |
|-------------|----------------|--------|-------|-------|-----------------|
| Ligand      | AIF            | 1.573  | 0.674 | 0.020 | 0.253 ; 2.894   |
|             | curdlan        | 0.224  | 0.668 | 0.737 | -1.085 ; 1.534  |
|             | chitin         | -0.397 | 0.668 | 0.552 | -1.706 ; 0.912  |
| Genotype    | FIBCD1         | -2.088 | 0.566 | 0.000 | -3.196 ; -0.979 |
| Interaction | AIF#FIBCD1     | -3.165 | 0.800 | 0.000 | -4.732 ; -1.597 |
|             | curdlan#FIBCD1 | 2.669  | 0.800 | 0.001 | 1.102 ; 4.237   |
|             | chitin#FIBCD1  | 1.736  | 0.800 | 0.030 | 0.168 ; 3.303   |
|             | cons           | -0.016 | 0.476 | 0.974 | -0.949 ; 0.918  |

## IL8

Ligand

|             |                |        |       |       |                 |
|-------------|----------------|--------|-------|-------|-----------------|
| Genotype    | AIF            | -0.049 | 0.470 | 0.916 | -0.970 ; 0.871  |
|             | curdlan        | 1.867  | 0.451 | 0.000 | 0.983 ; 2.751   |
|             | chitin         | -0.303 | 0.451 | 0.502 | -1.187 ; 0.582  |
| Interaction | FIBCD1         | -2.075 | 0.281 | 0.000 | -2.625 ; -1.525 |
|             | AIF#FIBCD1     | -1.972 | 0.397 | 0.000 | -2.749 ; -1.194 |
|             | curdlan#FIBCD1 | 1.295  | 0.397 | 0.001 | 0.518 ; 2.073   |
|             | chitin#FIBCD1  | 0.798  | 0.397 | 0.044 | 0.020 ; 1.575   |
| cons        |                | -0.009 | 0.332 | 0.979 | -0.659 ; 0.642  |

### IL12B

|             |                |        |       |       |                 |
|-------------|----------------|--------|-------|-------|-----------------|
| Ligand      | AIF            | -2.235 | 0.257 | 0.000 | -2.739 ; -1.732 |
|             | curdlan        | -0.597 | 0.255 | 0.019 | -1.097 ; -0.096 |
|             | chitin         | -0.426 | 0.255 | 0.095 | -0.927 ; 0.075  |
| Genotype    | FIBCD1         | 0.389  | 0.222 | 0.079 | -0.045 ; 0.824  |
| Interaction | AIF#FIBCD1     | 1.228  | 0.314 | 0.000 | 0.613 ; 1.843   |
|             | curdlan#FIBCD1 | 0.550  | 0.314 | 0.080 | -0.065 ; 1.165  |
|             | chitin#FIBCD1  | -0.199 | 0.314 | 0.527 | -0.814 ; 0.416  |
| cons        |                | -0.006 | 0.182 | 0.976 | -0.362 ; 0.351  |

### IL13

|             |                |        |       |       |                |
|-------------|----------------|--------|-------|-------|----------------|
| Ligand      | AIF            | -0.750 | 0.558 | 0.178 | -1.843 ; 0.342 |
|             | curdlan        | -0.010 | 0.545 | 0.986 | -1.078 ; 1.059 |
|             | chitin         | 0.433  | 0.545 | 0.427 | -0.636 ; 1.501 |
| Genotype    | FIBCD1         | 0.917  | 0.399 | 0.022 | 0.135 ; 1.698  |
| Interaction | AIF#FIBCD1     | -0.025 | 0.564 | 0.965 | -1.130 ; 1.080 |
|             | curdlan#FIBCD1 | 0.226  | 0.564 | 0.689 | -0.879 ; 1.331 |
|             | chitin#FIBCD1  | -0.872 | 0.564 | 0.122 | -1.977 ; 0.233 |
| cons        |                | -0.041 | 0.394 | 0.918 | -0.813 ; 0.732 |

### MUC1

|             |                |        |       |       |                 |
|-------------|----------------|--------|-------|-------|-----------------|
| Ligand      | AIF            | -1.194 | 0.327 | 0.000 | -1.834 ; -0.554 |
|             | curdlan        | 0.277  | 0.306 | 0.365 | -0.323 ; 0.878  |
|             | chitin         | -0.053 | 0.306 | 0.863 | -0.653 ; 0.548  |
| Genotype    | FIBCD1         | -1.766 | 0.148 | 0.000 | -2.055 ; -1.476 |
| Interaction | AIF#FIBCD1     | -0.646 | 0.209 | 0.002 | -1.055 ; -0.236 |
|             | curdlan#FIBCD1 | 0.268  | 0.209 | 0.199 | -0.141 ; 0.677  |

|               |                |        |       |       |                 |
|---------------|----------------|--------|-------|-------|-----------------|
|               | chitin#FIBCD1  | 0.071  | 0.209 | 0.734 | -0.338 ; 0.480  |
| <u>cons</u>   |                | -0.066 | 0.231 | 0.776 | -0.518 ; 0.387  |
| <b>MUC13</b>  |                |        |       |       |                 |
| Ligand        |                |        |       |       |                 |
|               | AIF            | -0.822 | 0.588 | 0.162 | -1.975 ; 0.331  |
|               | curdlan        | 0.100  | 0.583 | 0.864 | -1.042 ; 1.242  |
|               | chitin         | -0.096 | 0.583 | 0.869 | -1.238 ; 1.046  |
| Genotype      |                |        |       |       |                 |
|               | FIBCD1         | -3.188 | 0.484 | 0.000 | -4.137 ; -2.238 |
| Interaction   |                |        |       |       |                 |
|               | AIF#FIBCD1     | -4.313 | 0.685 | 0.000 | -5.655 ; -2.970 |
|               | curdlan#FIBCD1 | 0.915  | 0.685 | 0.181 | -0.427 ; 2.258  |
|               | chitin#FIBCD1  | 0.098  | 0.685 | 0.886 | -1.245 ; 1.440  |
| <u>cons</u>   |                | -0.008 | 0.416 | 0.986 | -0.823 ; 0.808  |
| <b>MUC5AC</b> |                |        |       |       |                 |
| Ligand        |                |        |       |       |                 |
|               | AIF            | -1.246 | 1.015 | 0.220 | -3.235 ; 0.743  |
|               | curdlan        | 0.262  | 0.973 | 0.787 | -1.644 ; 2.169  |
|               | chitin         | 0.714  | 0.973 | 0.463 | -1.192 ; 2.620  |
| Genotype      |                |        |       |       |                 |
|               | FIBCD1         | -2.143 | 0.589 | 0.000 | -3.298 ; -0.988 |
| Interaction   |                |        |       |       |                 |
|               | AIF#FIBCD1     | -5.442 | 0.833 | 0.000 | -7.076 ; -3.809 |
|               | curdlan#FIBCD1 | 0.712  | 0.833 | 0.393 | -0.922 ; 2.345  |
|               | chitin#FIBCD1  | -0.036 | 0.833 | 0.965 | -1.669 ; 1.597  |
| <u>cons</u>   |                | -0.052 | 0.718 | 0.942 | -1.459 ; 1.354  |
| <b>TJP1</b>   |                |        |       |       |                 |
| Ligand        |                |        |       |       |                 |
|               | AIF            | -0.141 | 0.102 | 0.168 | -0.342 ; 0.059  |
|               | curdlan        | -0.117 | 0.101 | 0.244 | -0.314 ; 0.080  |
|               | chitin         | -0.143 | 0.101 | 0.154 | -0.340 ; 0.054  |
| Genotype      |                |        |       |       |                 |
|               | FIBCD1         | -0.470 | 0.078 | 0.000 | -0.623 ; -0.317 |
| Interaction   |                |        |       |       |                 |
|               | AIF#FIBCD1     | -0.234 | 0.110 | 0.034 | -0.450 ; -0.017 |
|               | curdlan#FIBCD1 | 0.329  | 0.110 | 0.003 | 0.113 ; 0.546   |
|               | chitin#FIBCD1  | -0.005 | 0.110 | 0.963 | -0.221 ; 0.211  |
| <u>cons</u>   |                | -0.001 | 0.072 | 0.991 | -0.143 ; 0.141  |
| <b>OCLN</b>   |                |        |       |       |                 |
| Ligand        |                |        |       |       |                 |
|               | AIF            | 0.272  | 0.137 | 0.048 | 0.003 ; 0.541   |
|               | curdlan        | -0.739 | 0.134 | 0.000 | -1.002 ; -0.475 |
|               | chitin         | -0.577 | 0.134 | 0.000 | -0.840 ; -0.313 |
| Genotype      |                |        |       |       |                 |

|              |                |        |       |       |                 |
|--------------|----------------|--------|-------|-------|-----------------|
| Interaction  | FIBCD1         | 1.037  | 0.099 | 0.000 | 0.844 ; 1.231   |
|              | AIF#FIBCD1     | -0.585 | 0.140 | 0.000 | -0.859 ; -0.311 |
|              | curdlan#FIBCD1 | 0.510  | 0.140 | 0.000 | 0.236 ; 0.784   |
|              | chitin#FIBCD1  | 0.297  | 0.140 | 0.033 | 0.023 ; 0.571   |
|              | _cons          | -0.018 | 0.097 | 0.851 | -0.209 ; 0.172  |
| <b>ICAM1</b> |                |        |       |       |                 |
| Ligand       | AIF            | 0.115  | 0.408 | 0.777 | -0.069 ; 0.916  |
|              | curdlan        | 3.832  | 0.408 | 0.000 | 3.031 ; 4.632   |
|              | chitin         | 0.408  | 0.408 | 0.318 | -0.392 ; 1.208  |
|              | FIBCD1         | 4.283  | 0.408 | 0.000 | 3.483 ; 5.083   |
| Interaction  | AIF#FIBCD1     | -0.173 | 0.557 | 0.765 | -1.305 ; 0.959  |
|              | curdlan#FIBCD1 | -3.679 | 0.557 | 0.000 | -4.810 ; -2.547 |
|              | chitin#FIBCD1  | -0.393 | 0.557 | 0.496 | -1.525 ; 0.738  |
|              | _cons          | -0.077 | 0.289 | 0.791 | -0.642 ; 0.489  |
